# Supplementary material
Source: PubMed Central journal article supplement (PMC1851609)

|   |       |    |    |   |
|---|-------|----|----|---|
| ■ | N= 27 | 10 | 19 | 8 |
| □ | N= 17 | 7  | 12 |   |
| ◆ | N= 33 | 10 | 30 |   |
| ◇ | N= 29 | 10 | 29 |   |

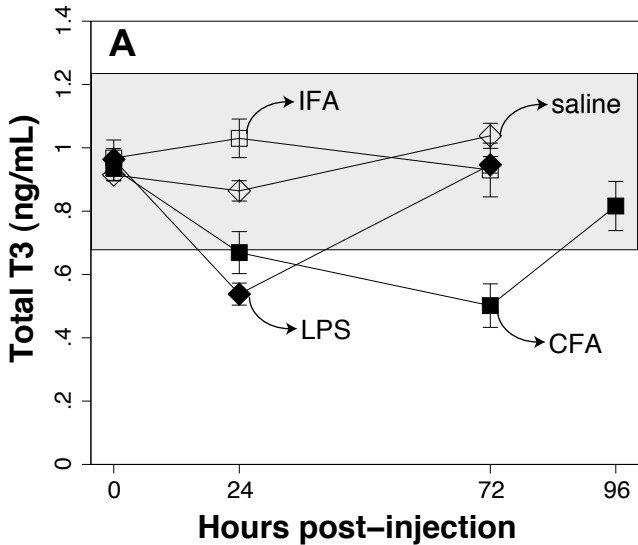

Supplement: pnas_0701319104_1.pdf [file pnas_0701319104_1.pdf]

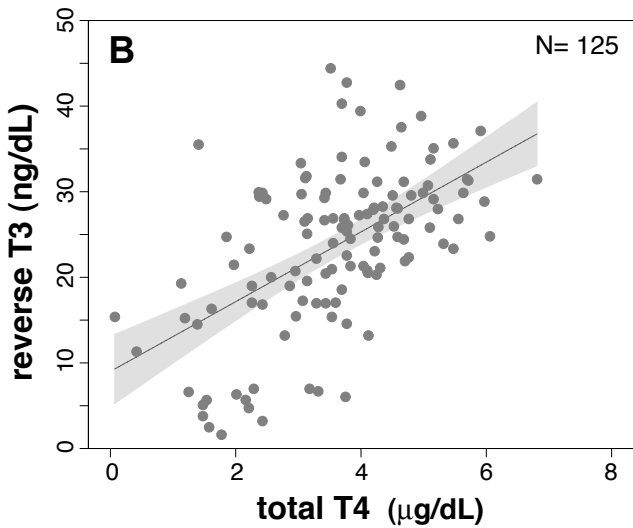

Supplement: pnas_0701319104_2.pdf [file pnas_0701319104_2.pdf]

|   |      |                  |   |   |
|---|------|------------------|---|---|
| ◆ | N= 5 | LPS then hTRH    | 5 | 5 |
| ◇ | N= 4 | LPS then saline  | 5 | 5 |
| □ | N= 5 | saline then hTRH | 5 | 5 |

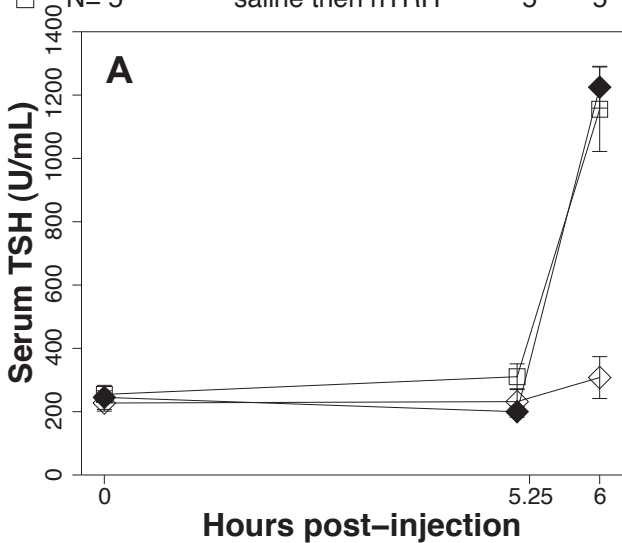

Supplement: pnas_0701319104_3.pdf [file pnas_0701319104_3.pdf]

|   |       |                         |    |    |
|---|-------|-------------------------|----|----|
| ◆ | N= 15 | LPS then hTRH           | 15 | 15 |
| ◇ | N= 5  | LPS then saline         | 5  | 5  |
| ○ | N= 5  | bleeding only then hTRH | 5  | 5  |

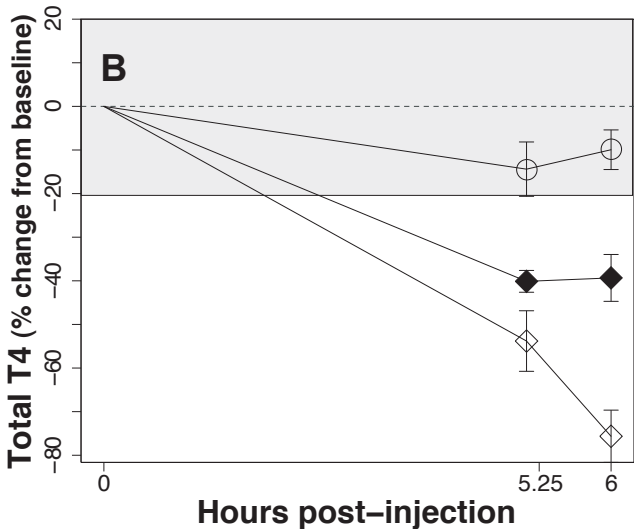

Supplement: pnas_0701319104_4.pdf [file pnas_0701319104_4.pdf]

|   |       |                                          |    |
|---|-------|------------------------------------------|----|
| ■ | N= 7  | LPS in IL-15 <sup>-/-</sup>              | 5  |
| ○ | N= 16 | LPS in TCR $\gamma\delta$ <sup>-/-</sup> | 10 |
| ◇ | N= 8  | LPS in RAG1 <sup>-/-</sup>               | 7  |
| ▲ | N= 11 | LPS in wild type                         | 11 |

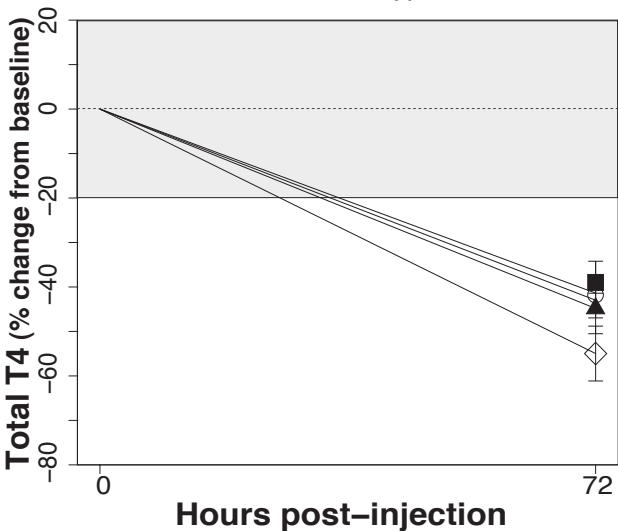

Supplement: pnas_0701319104_5.pdf [file pnas_0701319104_5.pdf]

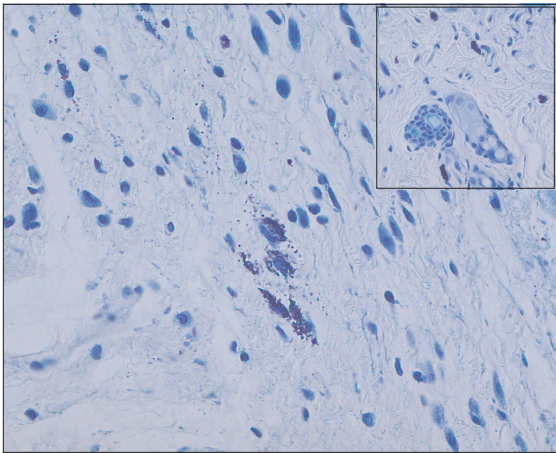

Supplement: pnas_0701319104_6.pdf [file pnas_0701319104_6.pdf]

**A**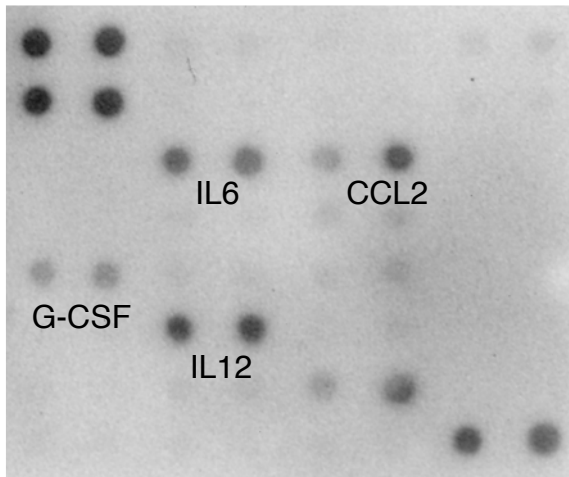**B**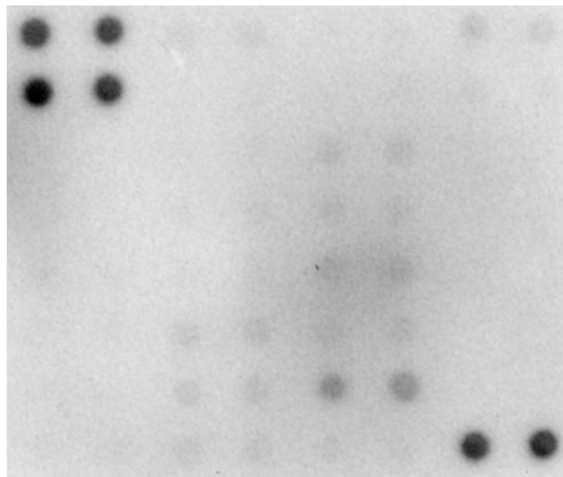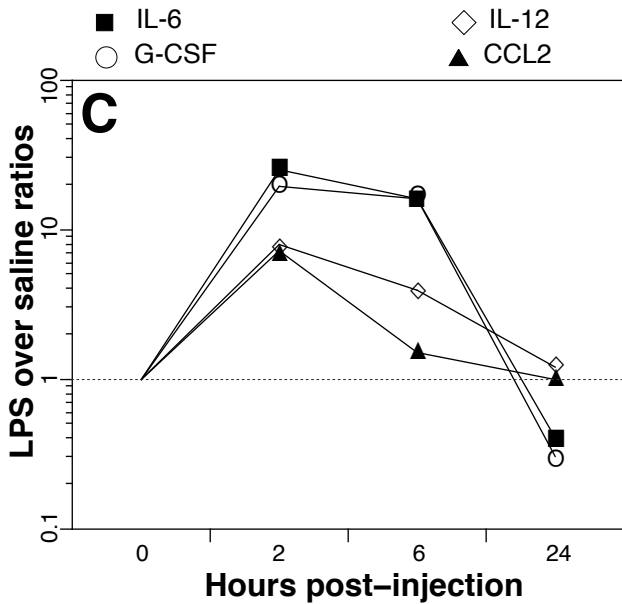

|         |    |                                    |    |
|---------|----|------------------------------------|----|
| ● N= 10 | 5  | LPS in <i>Stat1</i> <sup>-/-</sup> | 10 |
| ◆ N= 5  | 5  | LPS in <i>IL-6</i> <sup>-/-</sup>  | 5  |
| ■ N= 10 | 10 | LPS in <i>TNF-α</i> <sup>-/-</sup> | 10 |
| □ N= 5  | 5  | LPS in wild type                   | 5  |

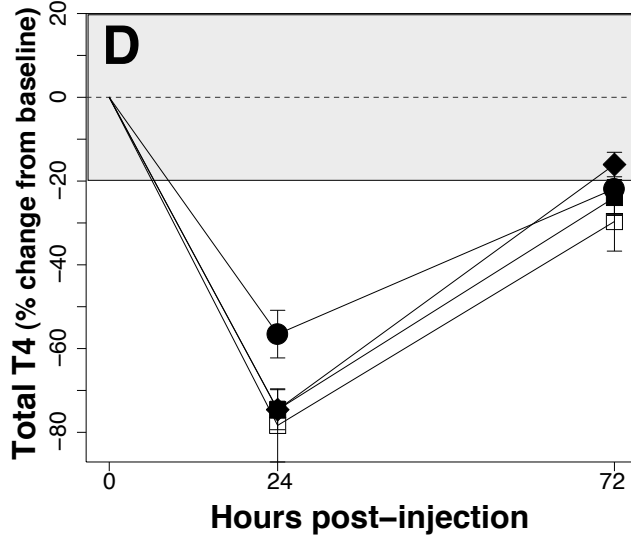

Supplement: pnas_0701319104_7.pdf [file pnas_0701319104_7.pdf]
